# Supplementary material
Source: publisher figshare collection journal article supplement (https://acs.figshare.com/ndownloader/files/3823510)

**Chemoenzymatic Routes to Enantiomerically Enriched and Polyoxygenated  
Perhydro-3,5a-methanoindeno[4,5-*c*]furans Related to the Tashironin Class of Sesquiterpenes**

Mukesh K. Sharma, Martin G. Banwell,\* and Anthony C. Willis

*Research School of Chemistry, Institute of Advanced Studies,  
The Australian National University, Canberra ACT 2601, Australia*

Martin.Banwell@anu.edu.au

| <b>CONTENTS</b>                                                                                          | <b>Page</b> |
|----------------------------------------------------------------------------------------------------------|-------------|
| – Anisotropic Displacement Ellipsoid Plots for Compounds <b>10</b> , <b>13</b> , <b>17</b> and <b>20</b> | S2          |
| – <sup>1</sup> H and <sup>13</sup> C NMR Spectra of Compounds <b>10–22</b>                               | S5          |

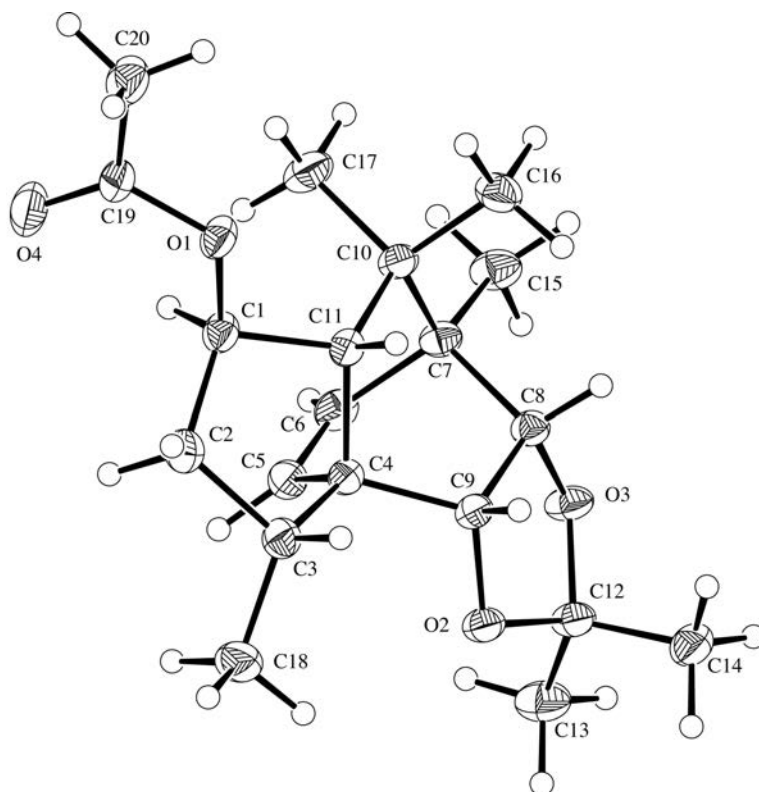

**Figure S1:** Structure of compound **10** (CCDC 1028238) with labelling of selected atoms. Anisotropic displacement ellipsoids show 30% probability levels. Hydrogen atoms are drawn as circles with small radii.

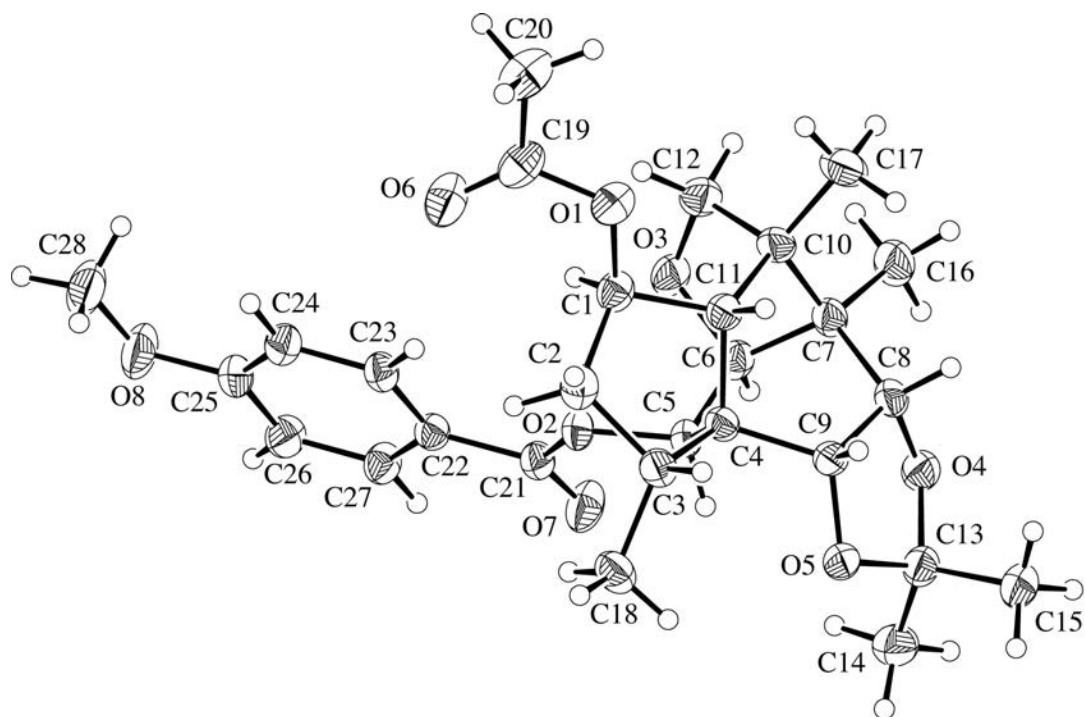

**Figure S2:** Structure of compound **13** (CCDC 1028241) with labelling of selected atoms. Anisotropic displacement ellipsoids show 30% probability levels. Hydrogen atoms are drawn as circles with small radii.

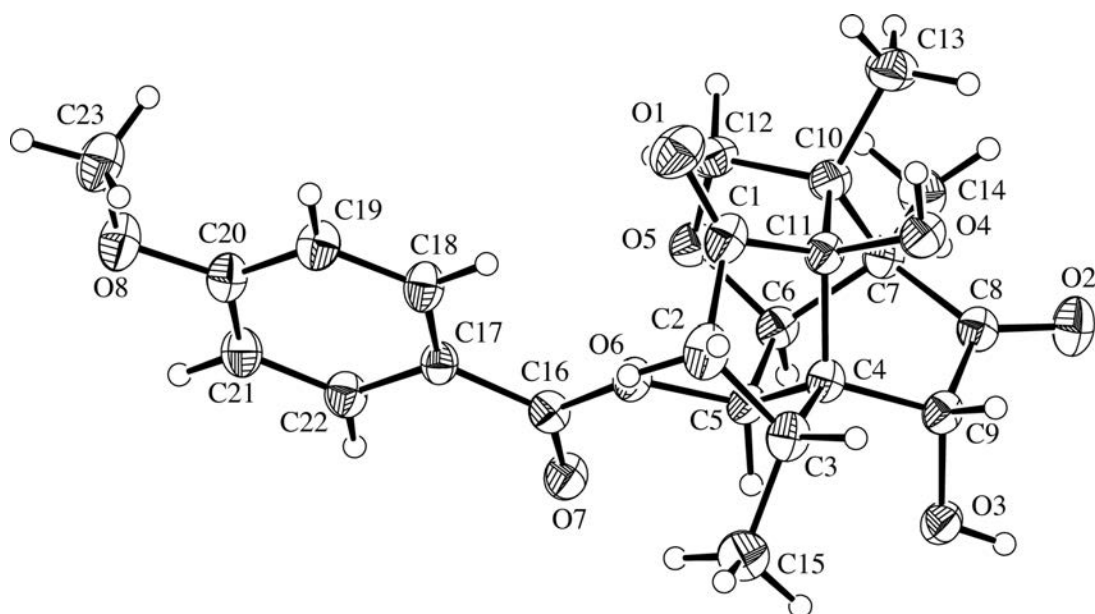

**Figure S3a:** Structure of molecule 1 of compound **17** (CCDC 1028242) with labelling of selected atoms. Anisotropic displacement ellipsoids show 30% probability levels. Hydrogen atoms are drawn as circles with small radii.

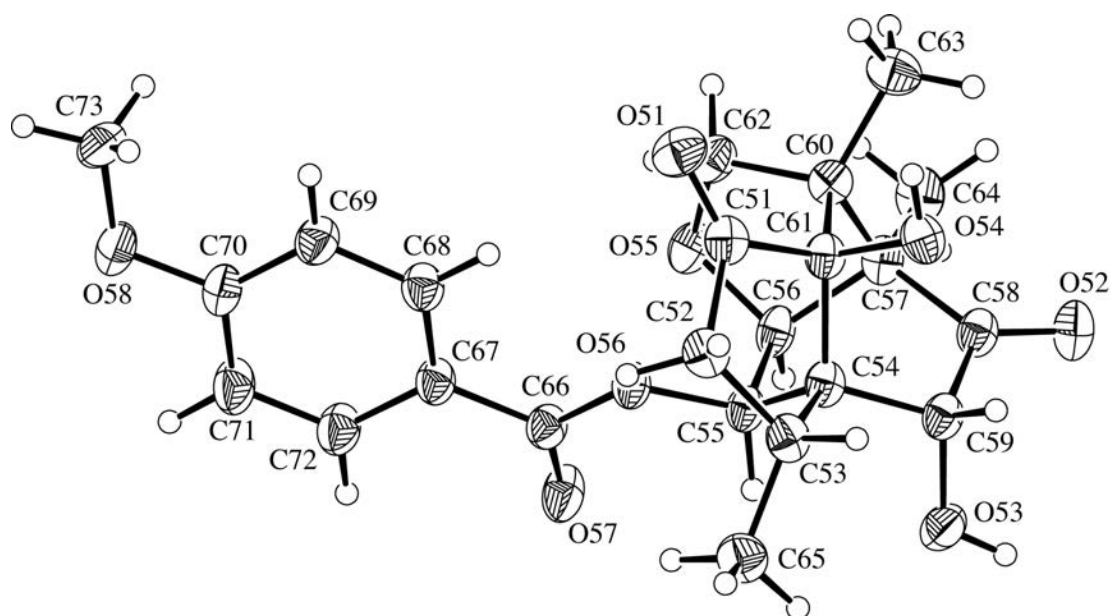

**Figure S3b:** Structure of molecule 2 of compound **17** (CCDC 1028242) with labelling of selected atoms. Anisotropic displacement ellipsoids show 30% probability levels. Hydrogen atoms are drawn as circles with small radii.

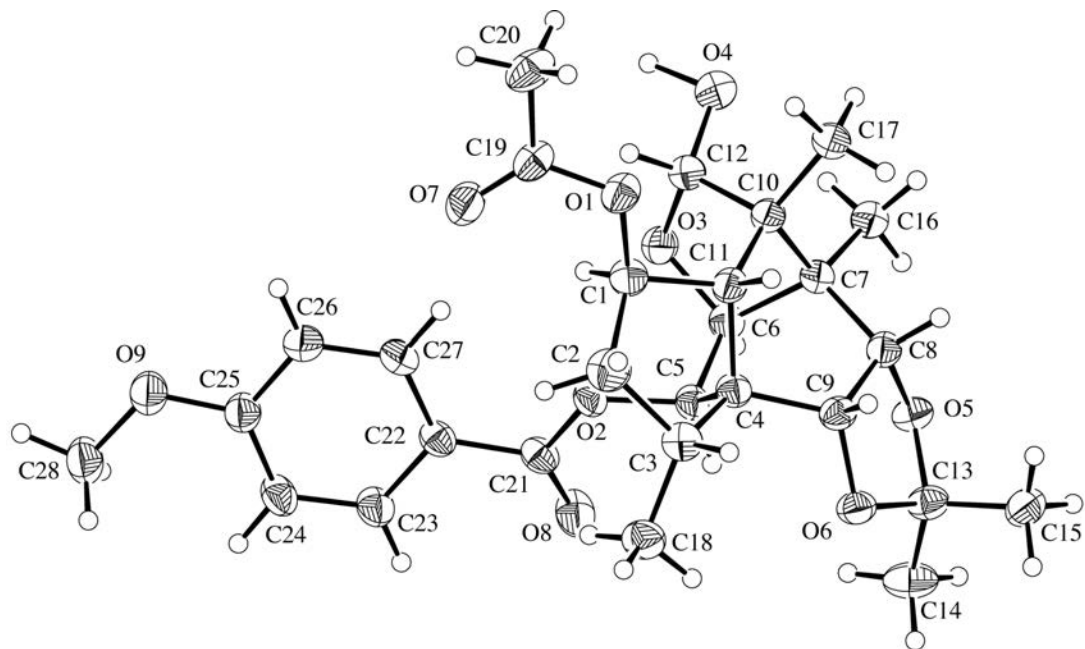

**Figure S4:** Structure of compound **20** (CCDC 1028244) with labelling of selected atoms. Anisotropic displacement ellipsoids show 30% probability levels. Hydrogen atoms are drawn as circles with small radii.

400 MHz  $^1\text{H}$  NMR Spectrum of Compound **10** (Recorded in  $\text{CDCl}_3$ )

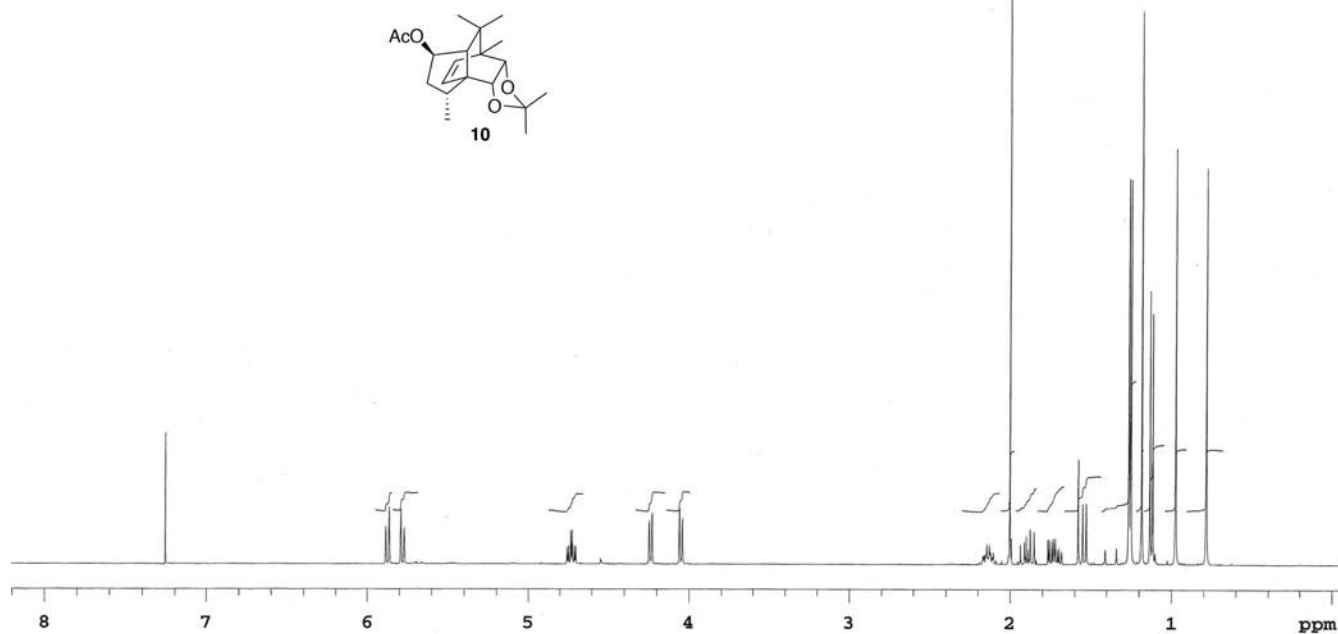

100 MHz  $^{13}\text{C}$  NMR Spectrum of Compound **10** (Recorded in  $\text{CDCl}_3$ )

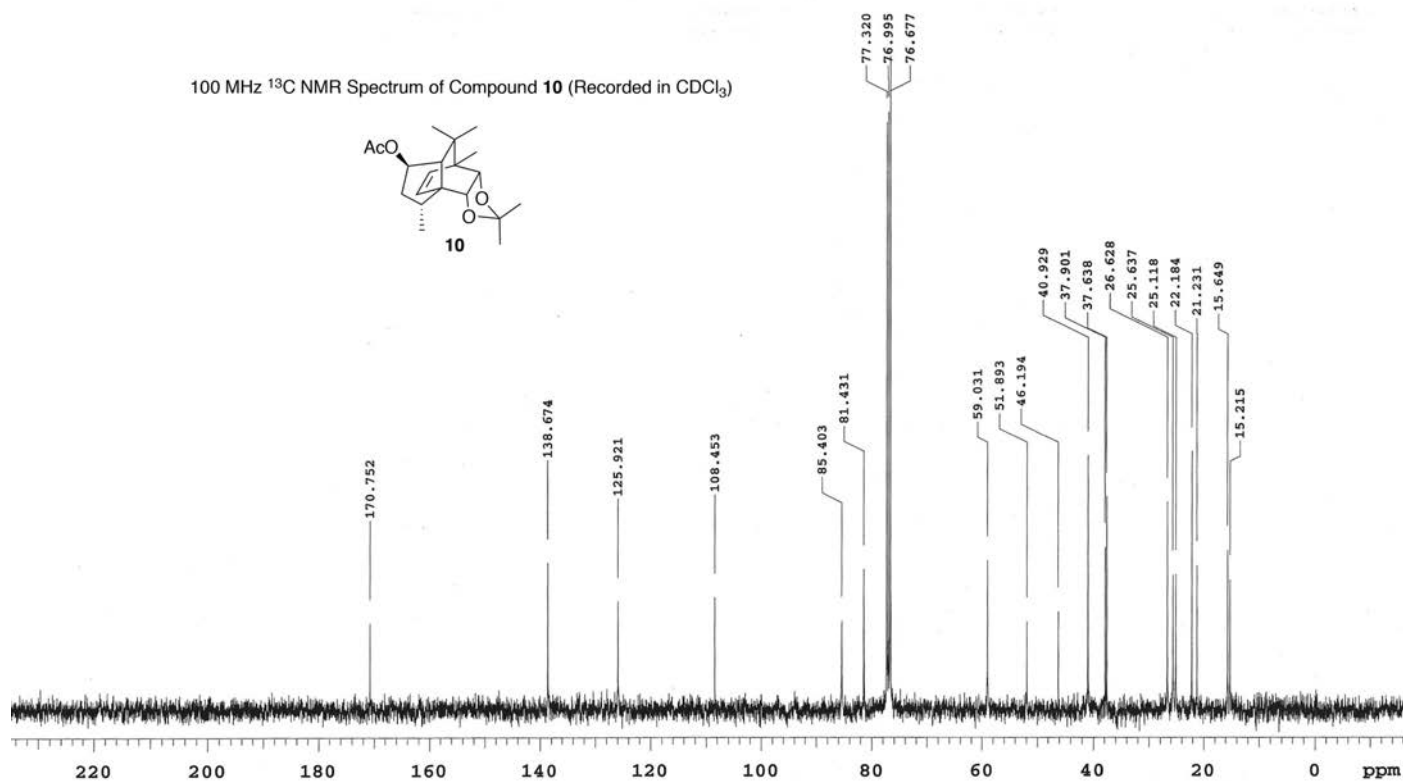

400 MHz  $^1\text{H}$  NMR Spectrum of Compound **11** (Recorded in  $\text{CDCl}_3$ )

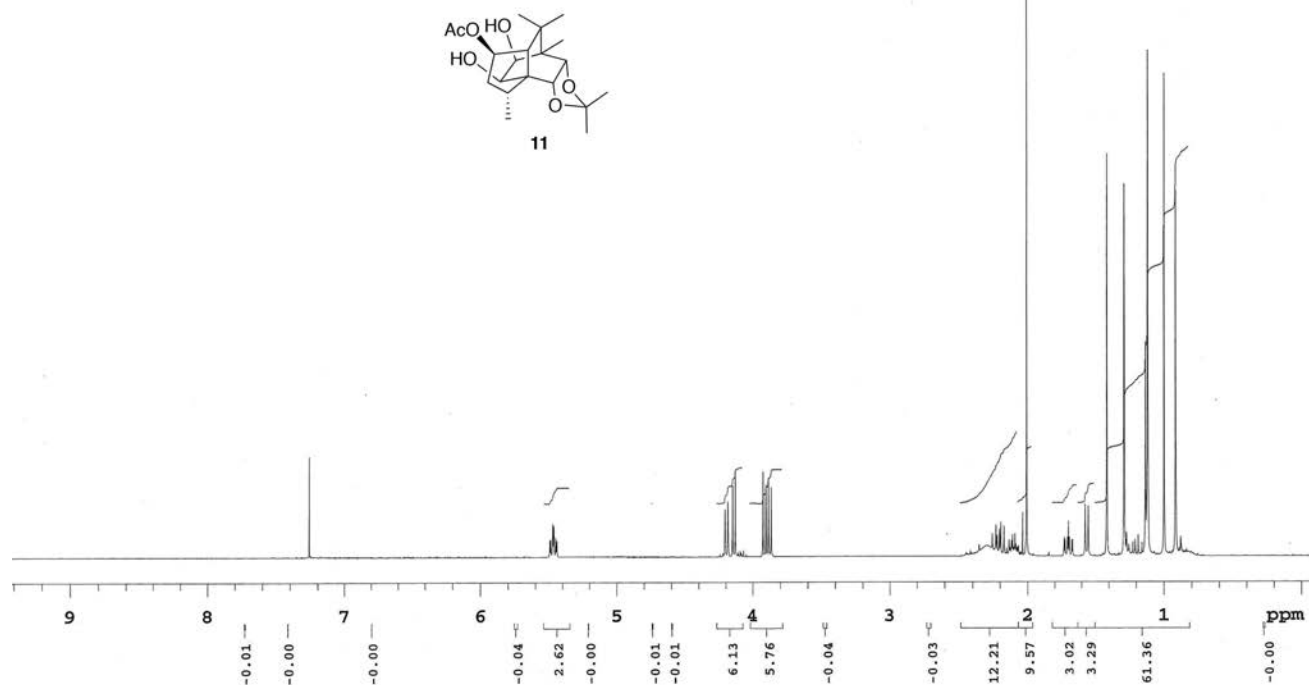

100 MHz  $^{13}\text{C}$  NMR Spectrum of Compound **11** (Recorded in  $\text{CDCl}_3$ )

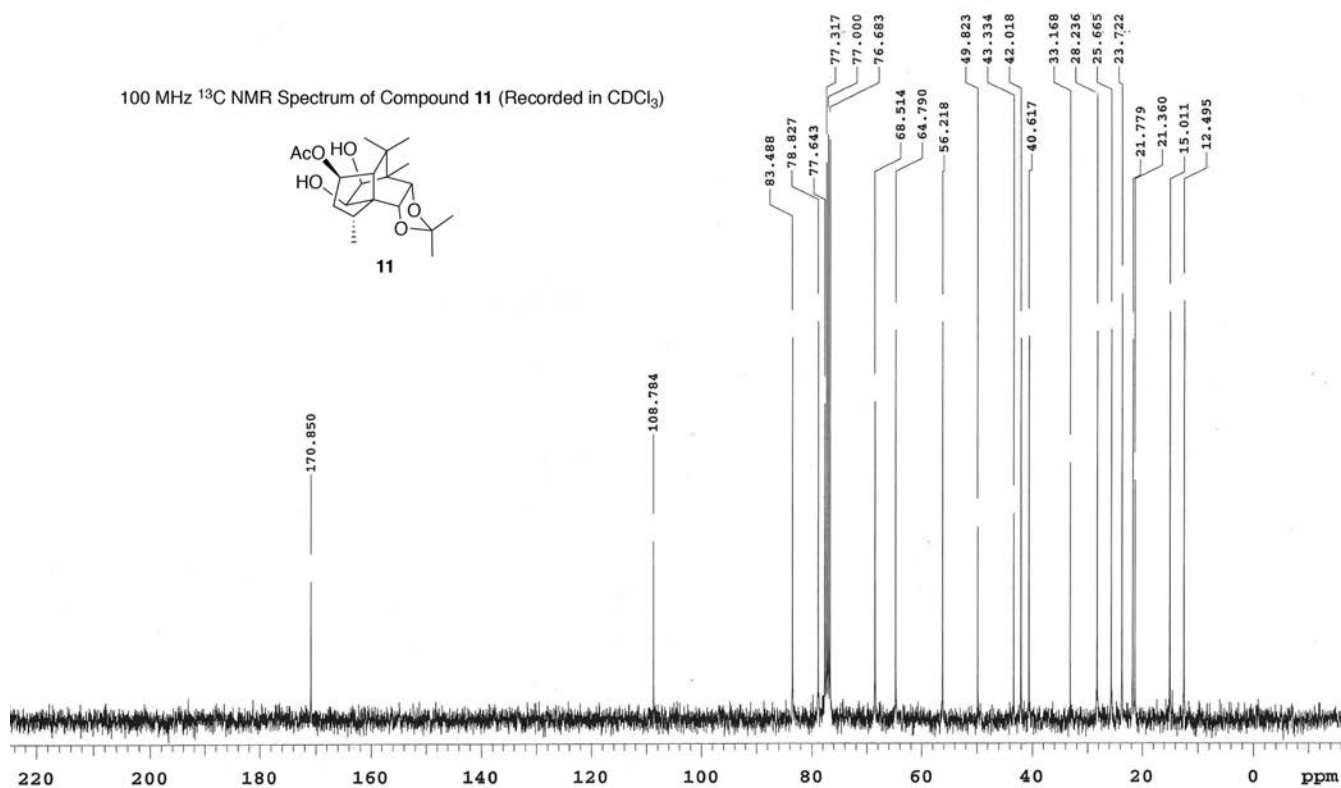

400 MHz  $^1\text{H}$  NMR Spectrum of Compound **12** (Recorded in  $\text{CDCl}_3$ )

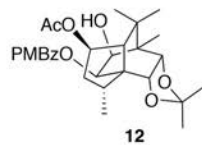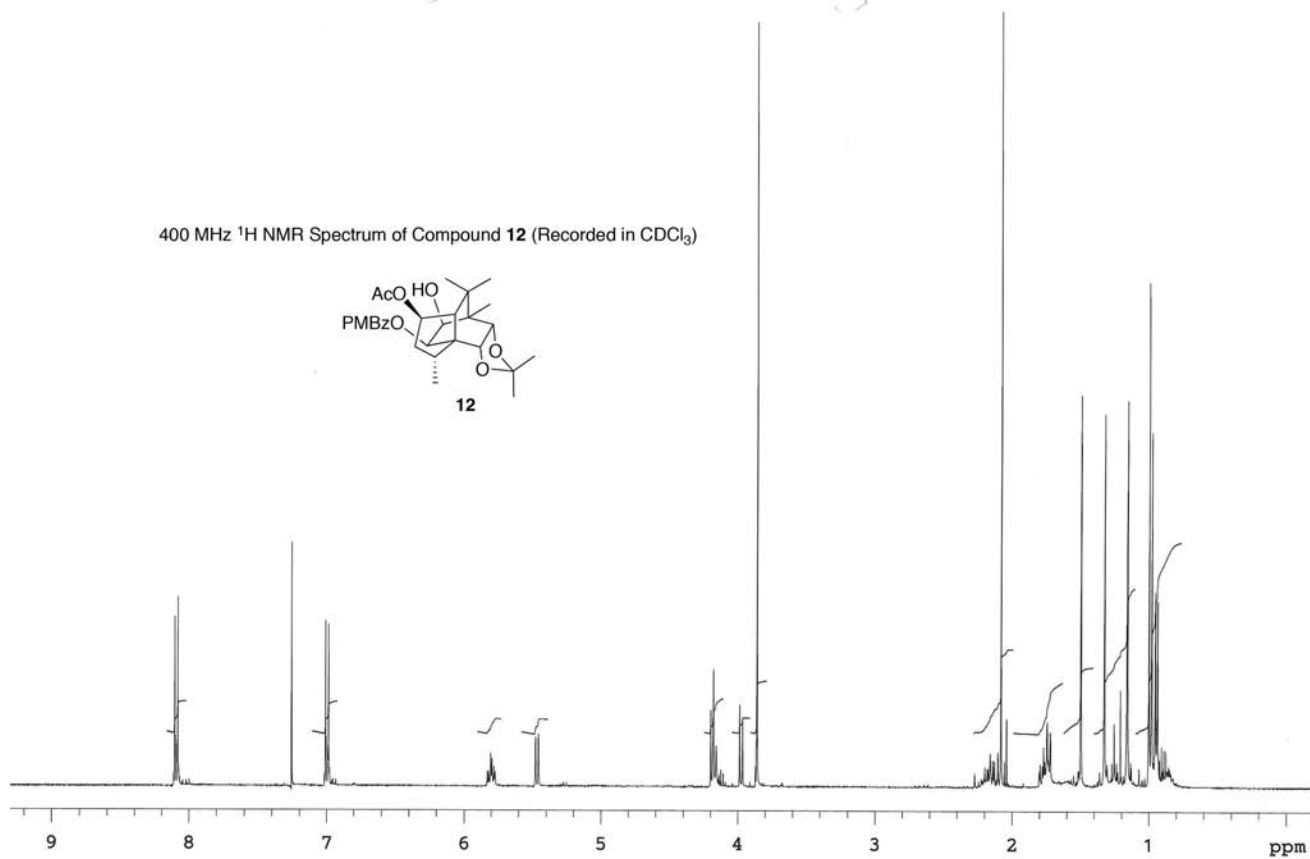

100 MHz  $^{13}\text{C}$  NMR Spectrum of Compound **12** (Recorded in  $\text{CDCl}_3$ )

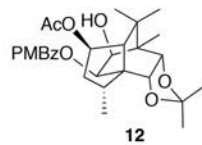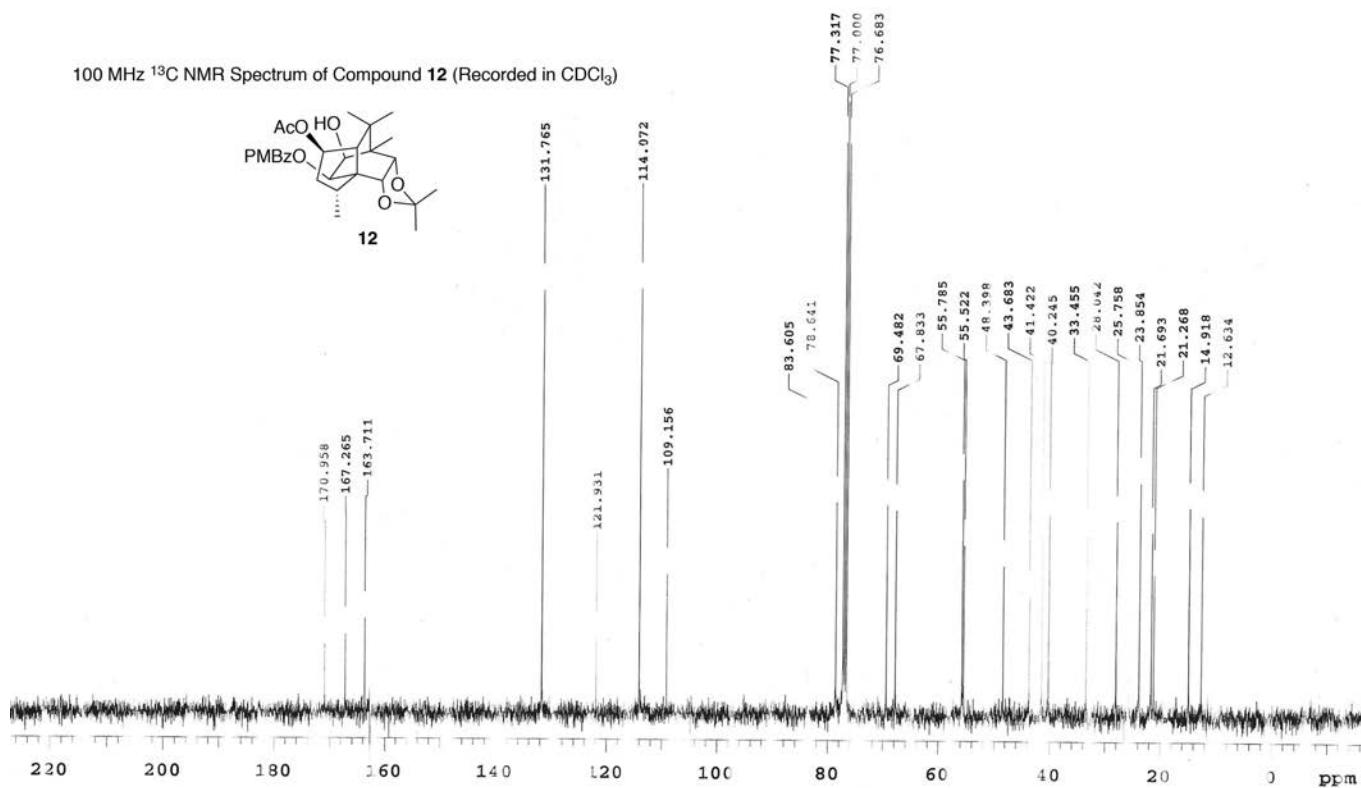

400 MHz  $^1\text{H}$  NMR Spectrum of Compound **13** (Recorded in  $\text{CDCl}_3$ )

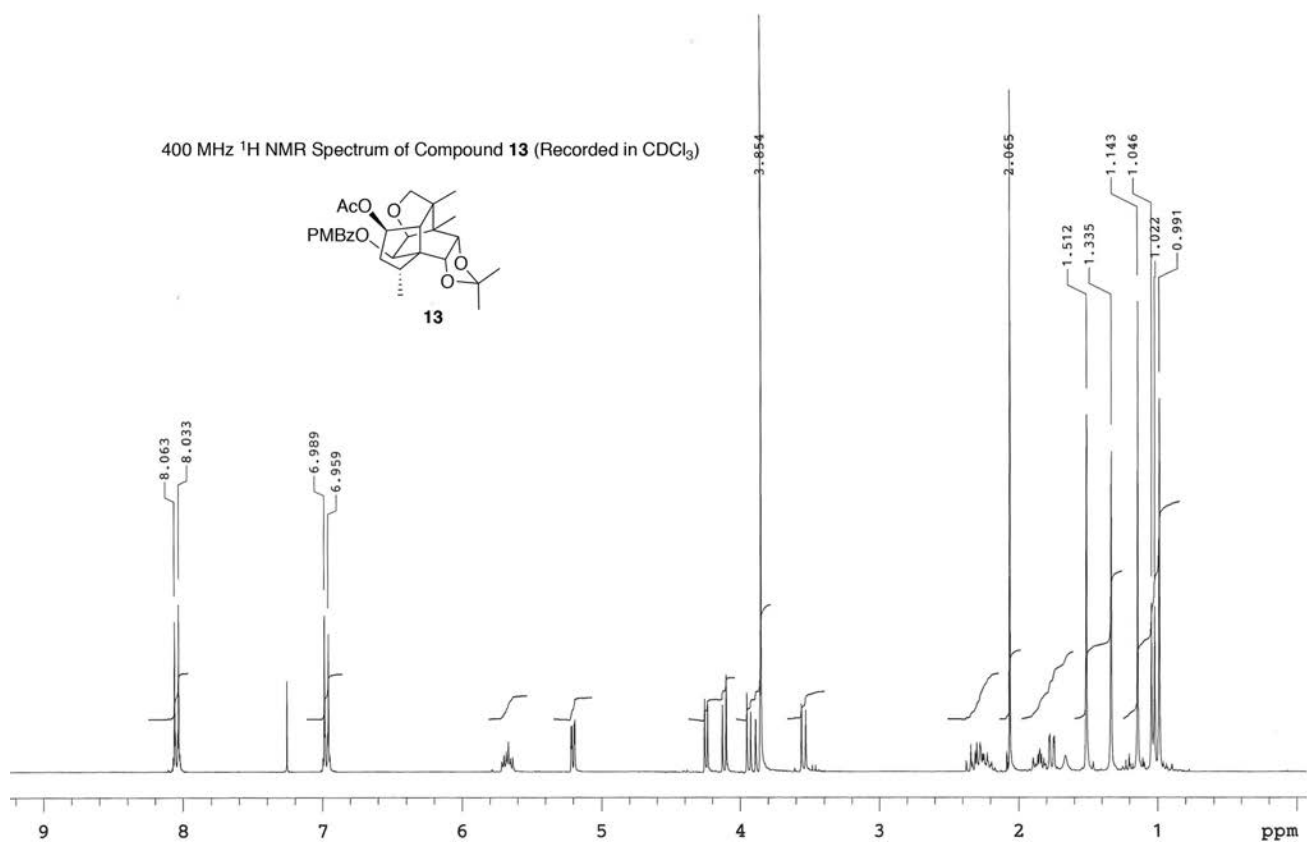

100 MHz  $^{13}\text{C}$  NMR Spectrum of Compound **13** (Recorded in  $\text{CDCl}_3$ )

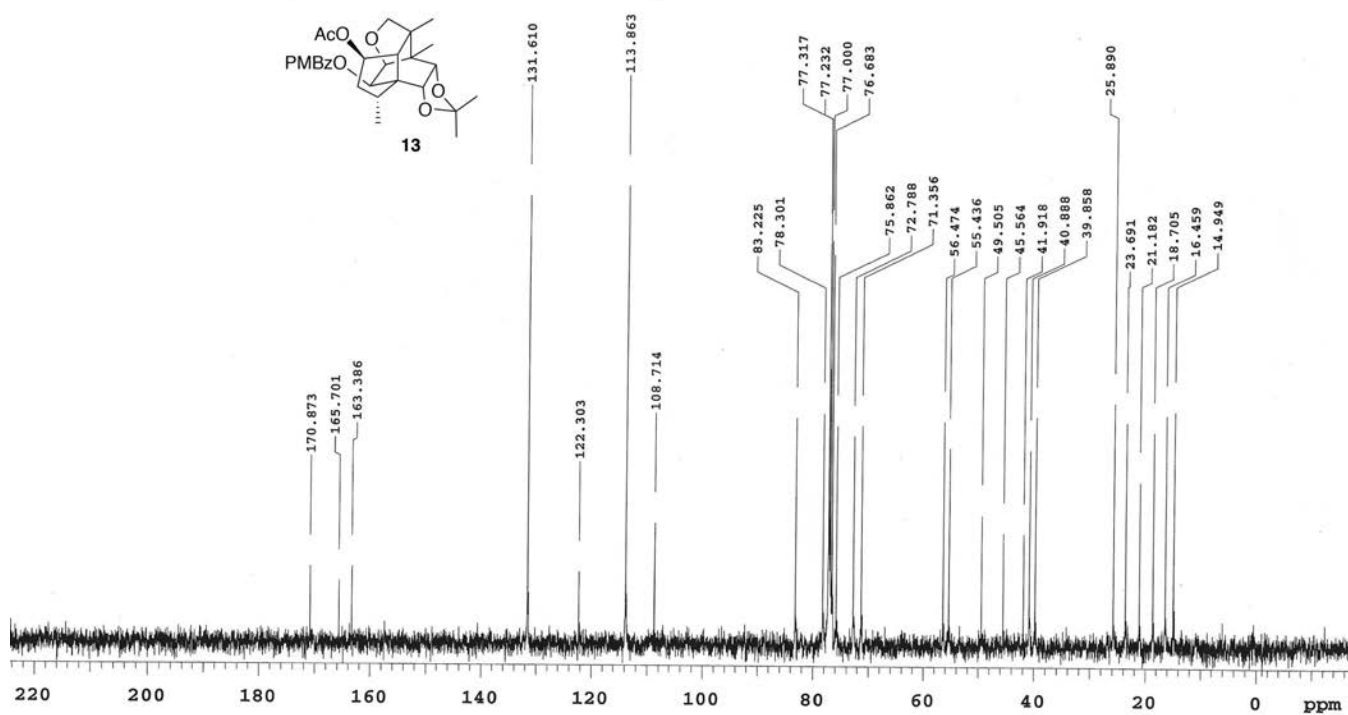



400 MHz  $^1\text{H}$  NMR Spectrum of Compound **14** (Recorded in  $\text{CDCl}_3$ )

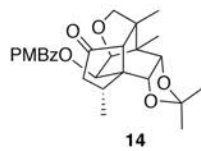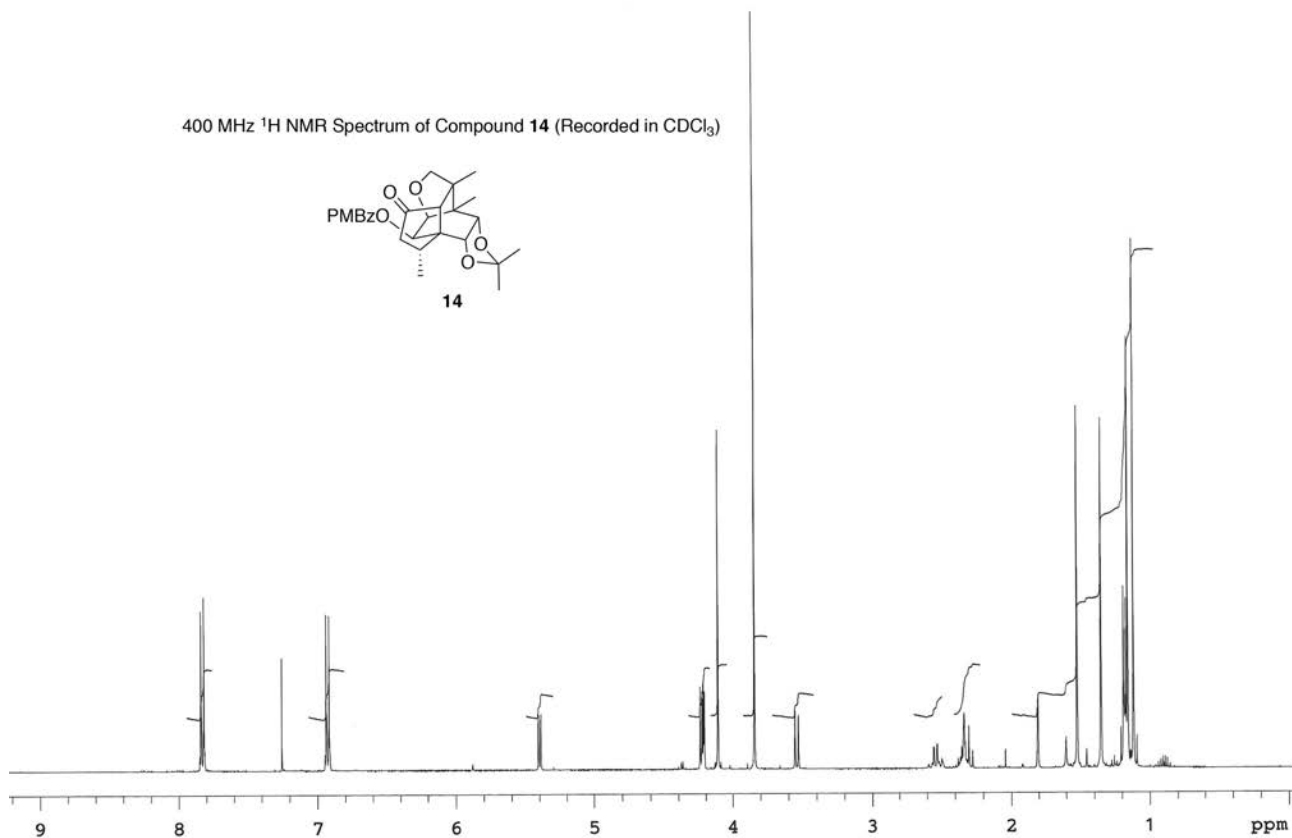

100 MHz  $^{13}\text{C}$  NMR Spectrum of Compound **14** (Recorded in  $\text{CDCl}_3$ )

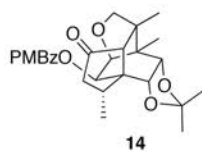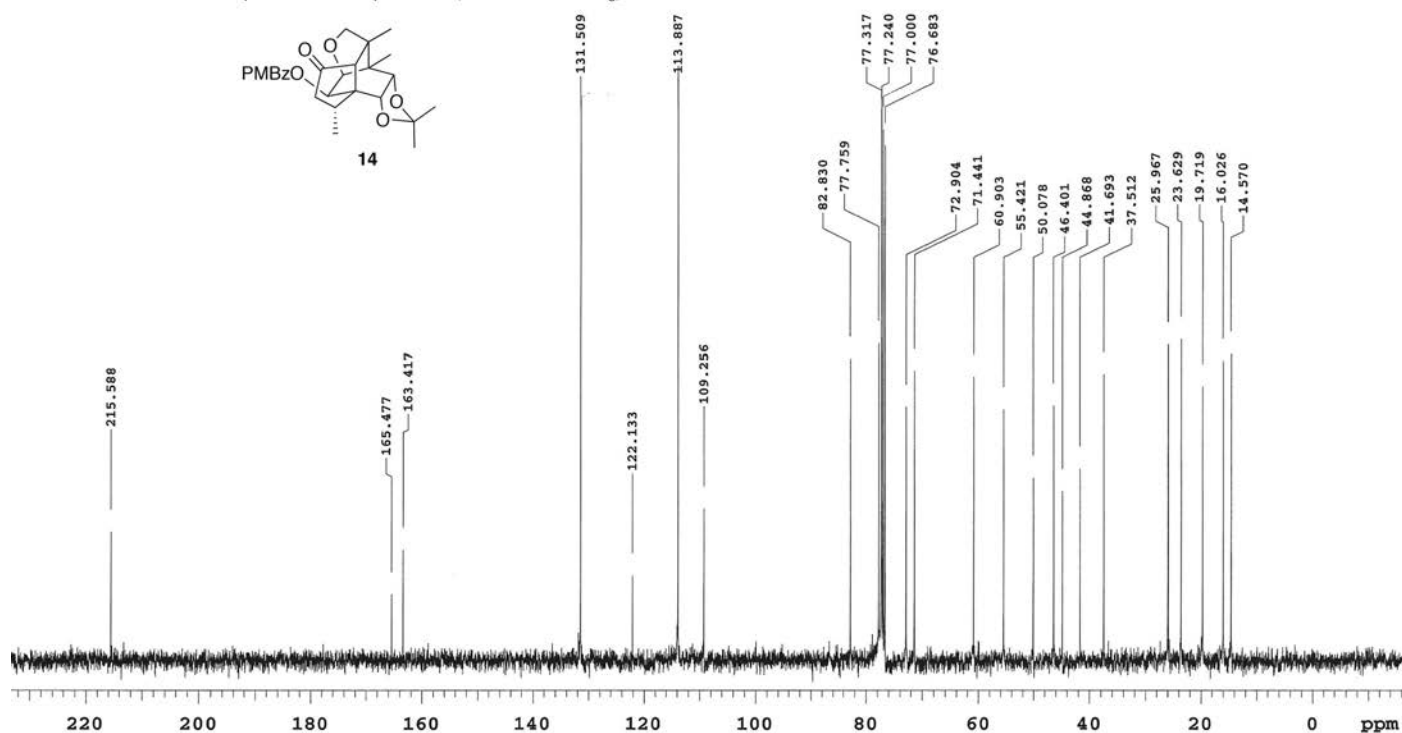

400 MHz  $^1\text{H}$  NMR Spectrum of Compound **15** (Recorded in  $\text{CDCl}_3$ )

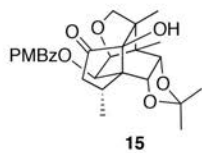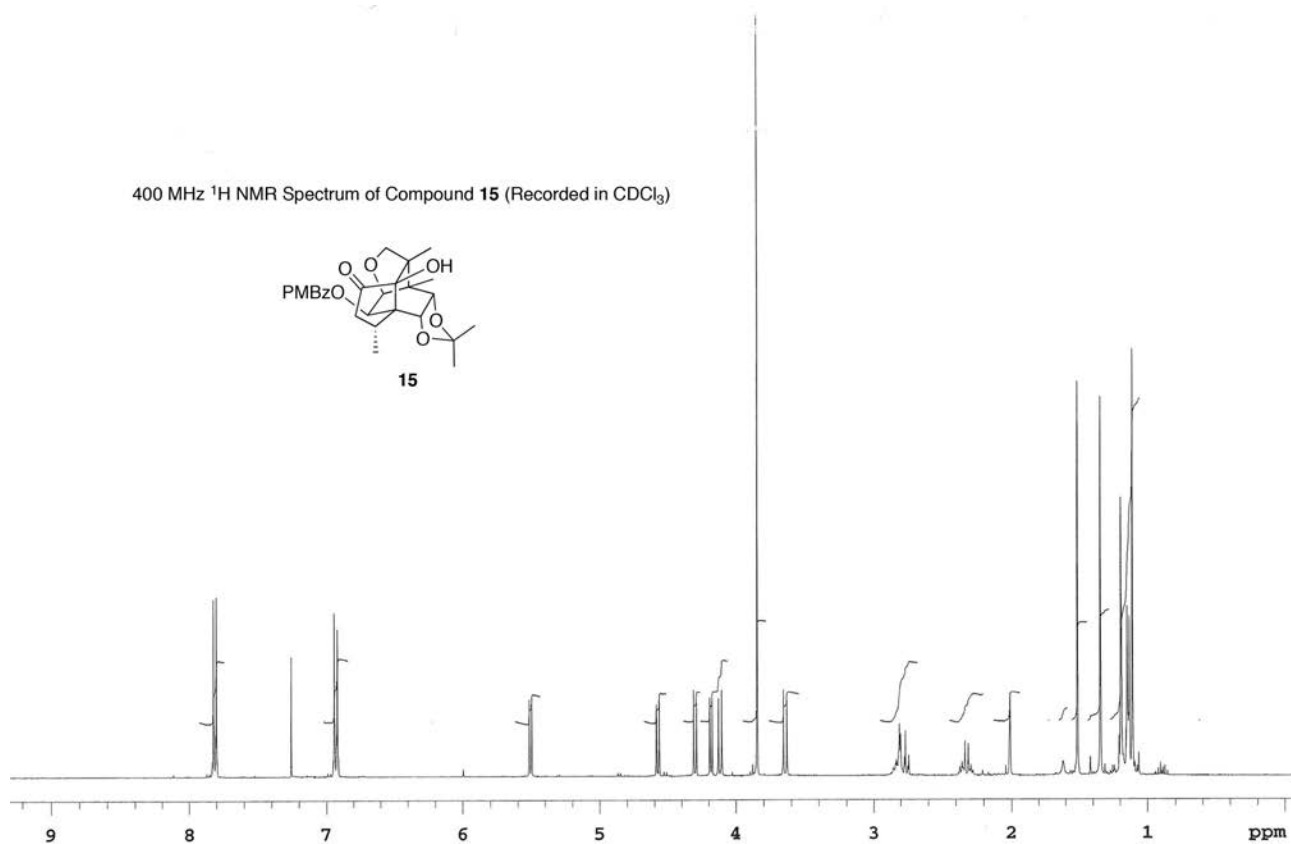

100 MHz  $^{13}\text{C}$  NMR Spectrum of Compound **15** (Recorded in  $\text{CDCl}_3$ )

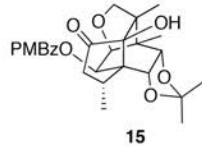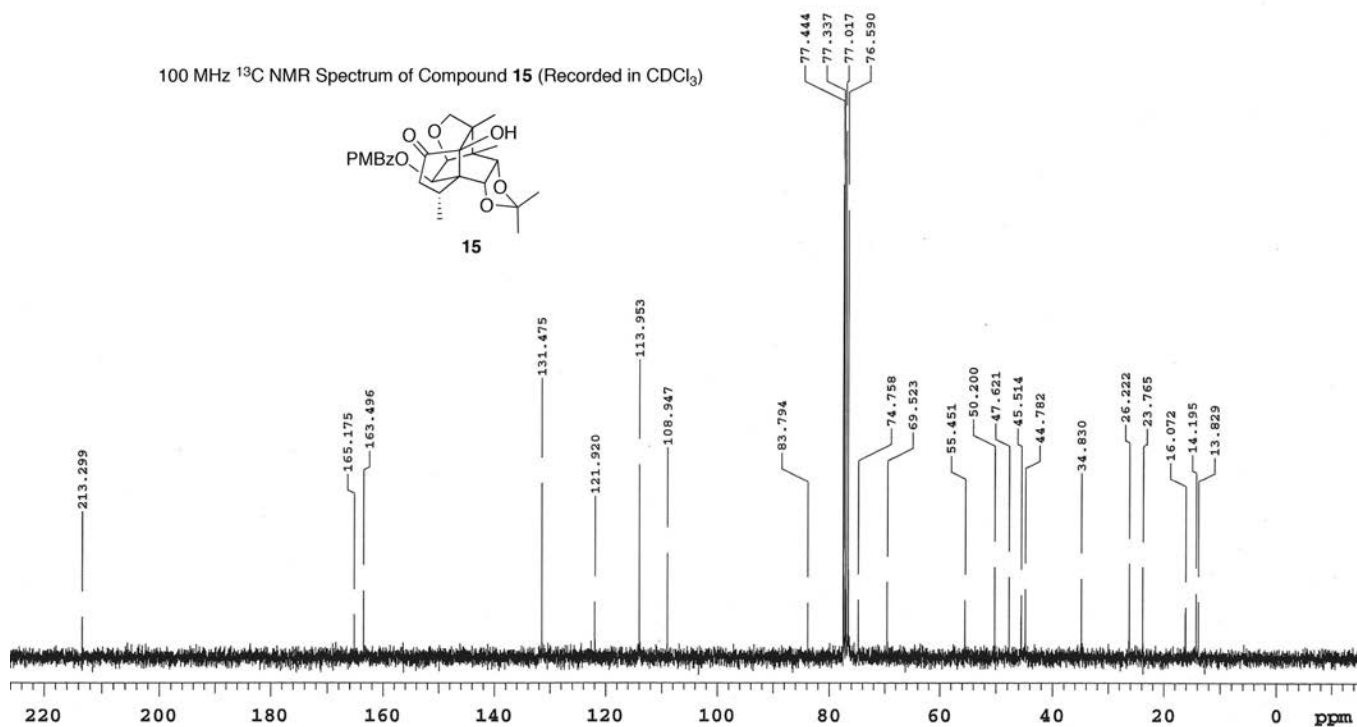

400 MHz  $^1\text{H}$  NMR Spectrum of Compound **16** (Recorded in  $\text{CDCl}_3$ )

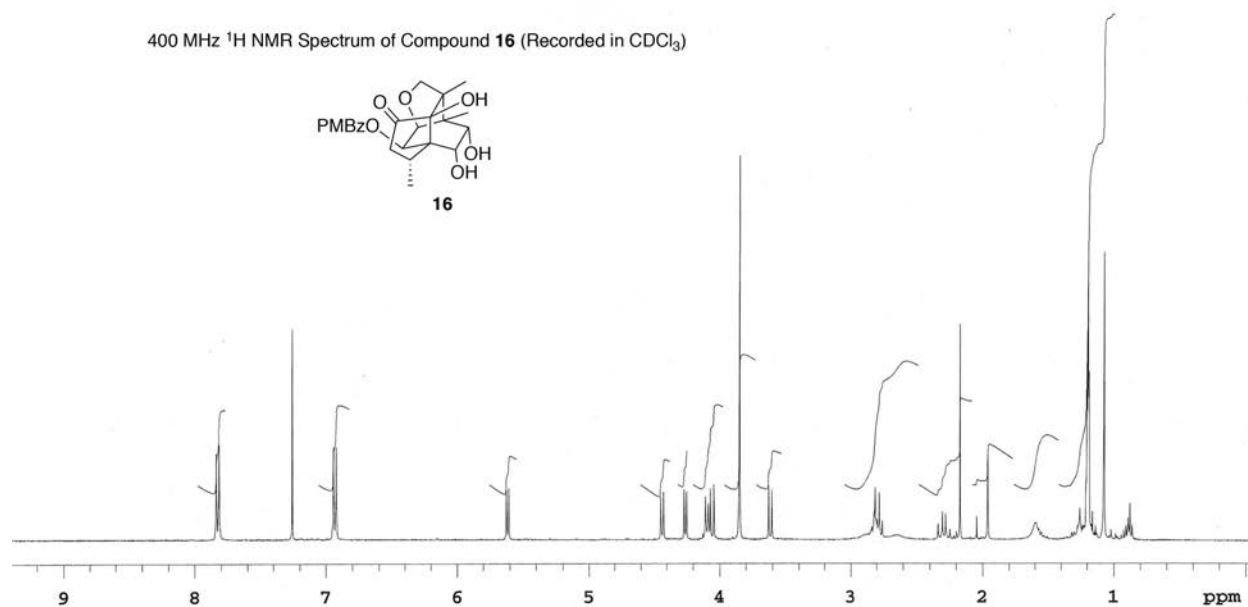

100 MHz  $^{13}\text{C}$  NMR Spectrum of Compound **16** (Recorded in  $\text{CDCl}_3$ )

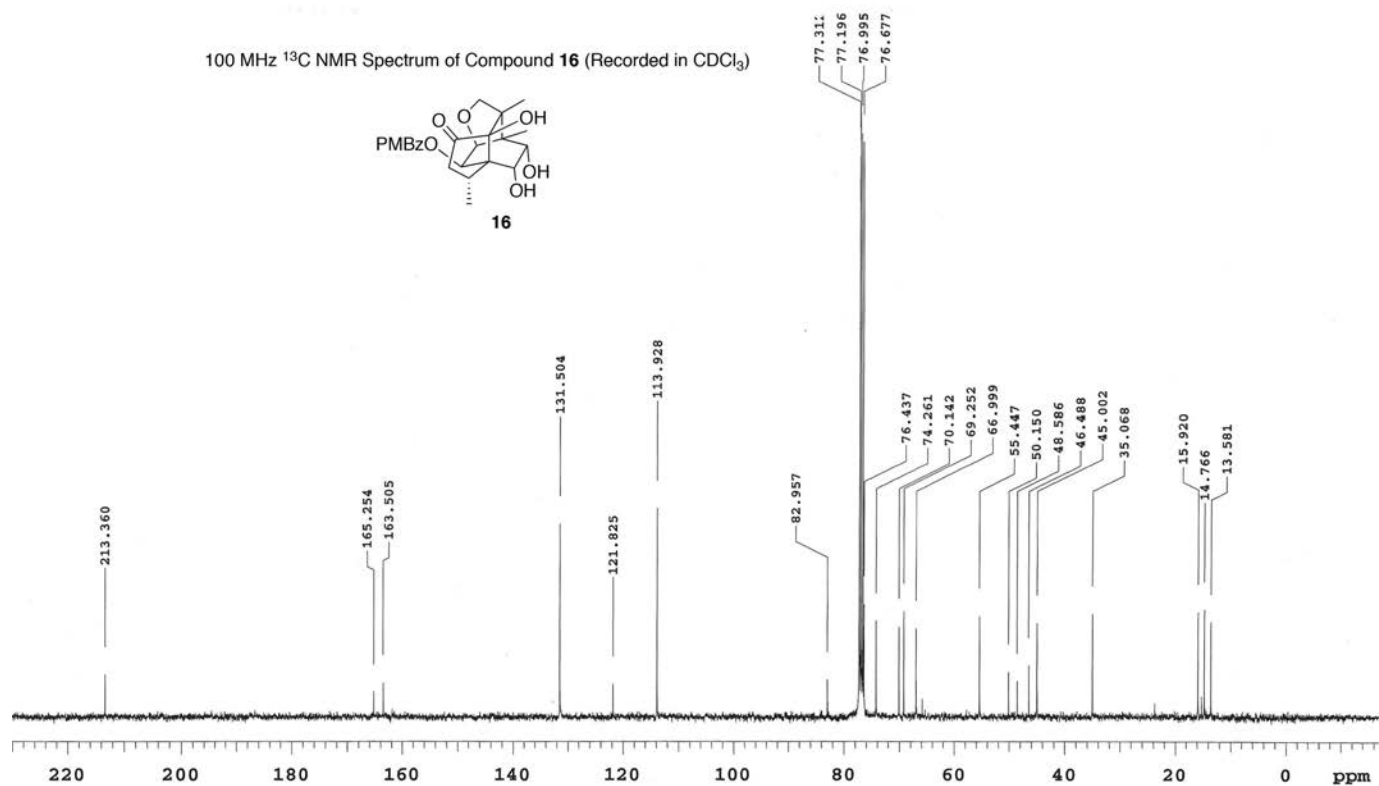

400 MHz  $^1\text{H}$  NMR Spectrum of Compound **17** (Recorded in  $\text{CDCl}_3$ )

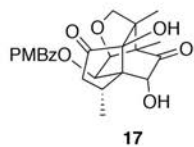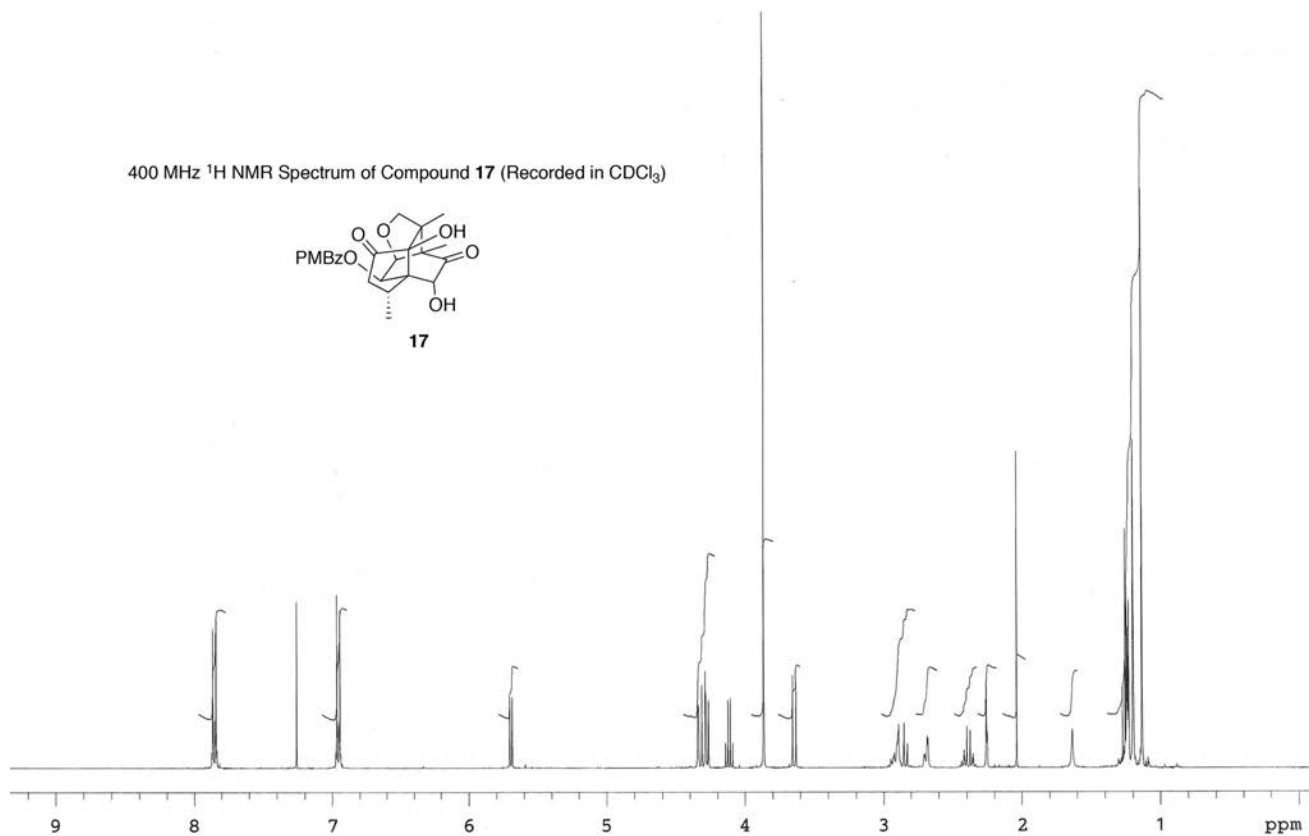

100 MHz  $^{13}\text{C}$  NMR Spectrum of Compound **17** (Recorded in  $\text{CDCl}_3$ )

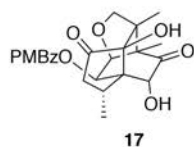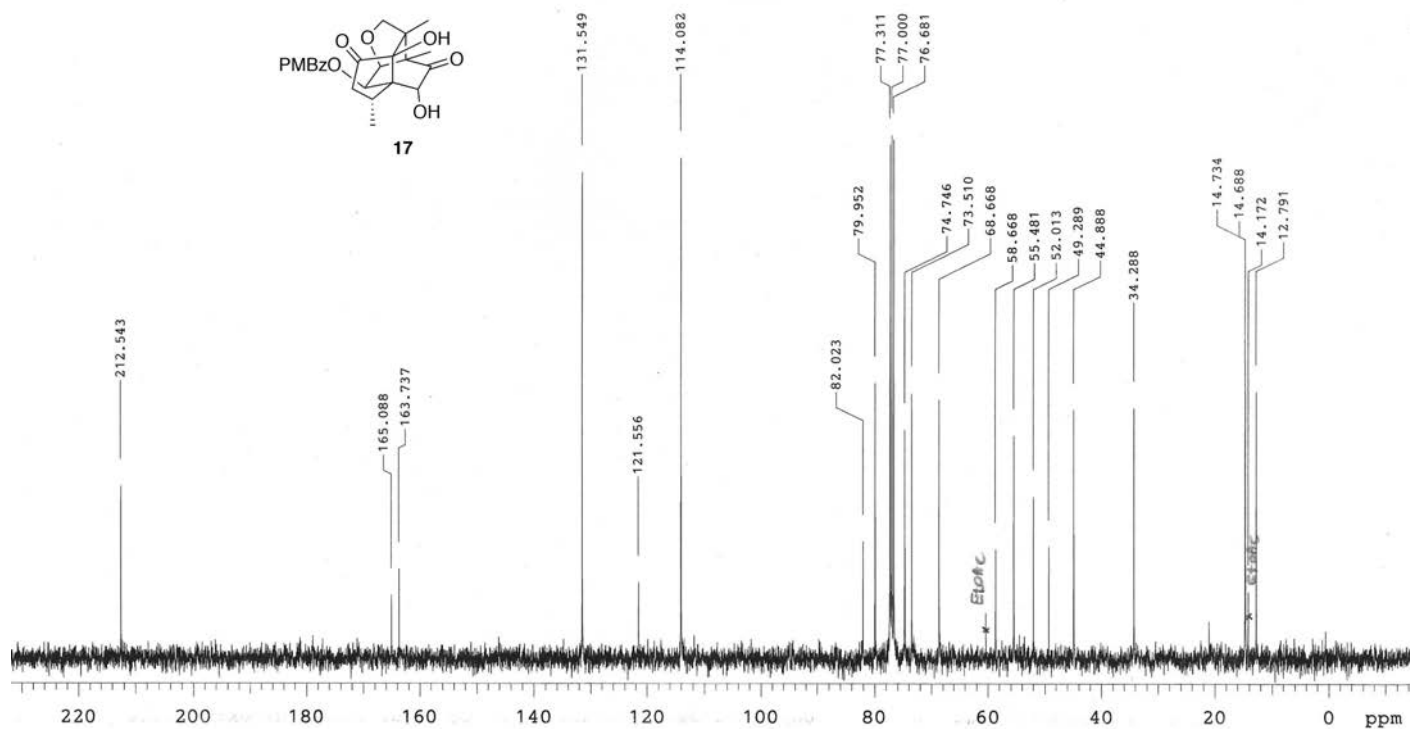

400 MHz  $^1\text{H}$  NMR Spectrum of Compound **18** (Recorded in  $\text{CDCl}_3$ )

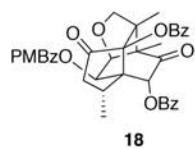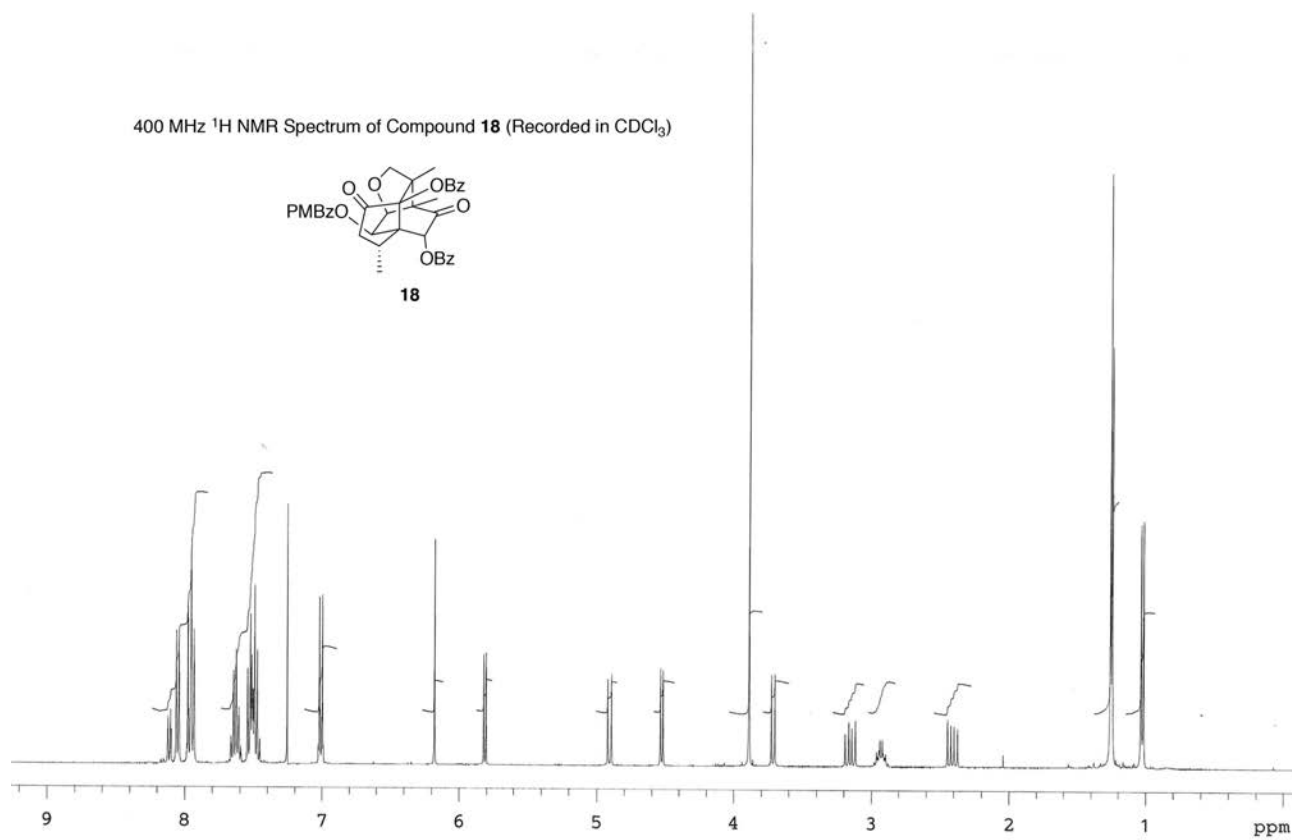

400 MHz  $^1\text{H}$  NMR Spectrum of Compound **19** (Recorded in  $\text{CDCl}_3$ )

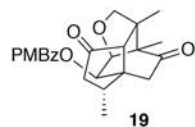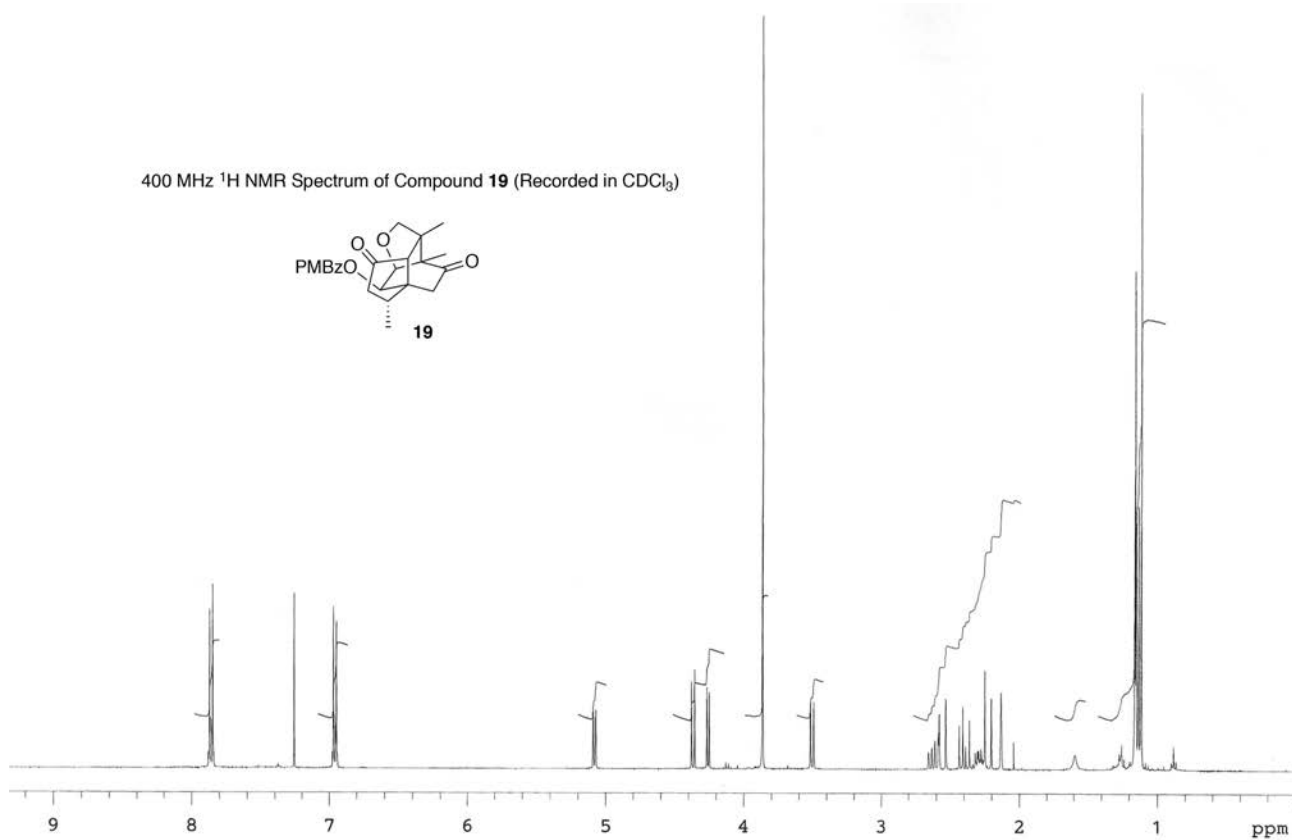

100 MHz  $^{13}\text{C}$  NMR Spectrum of Compound **19** (Recorded in  $\text{CDCl}_3$ )

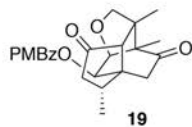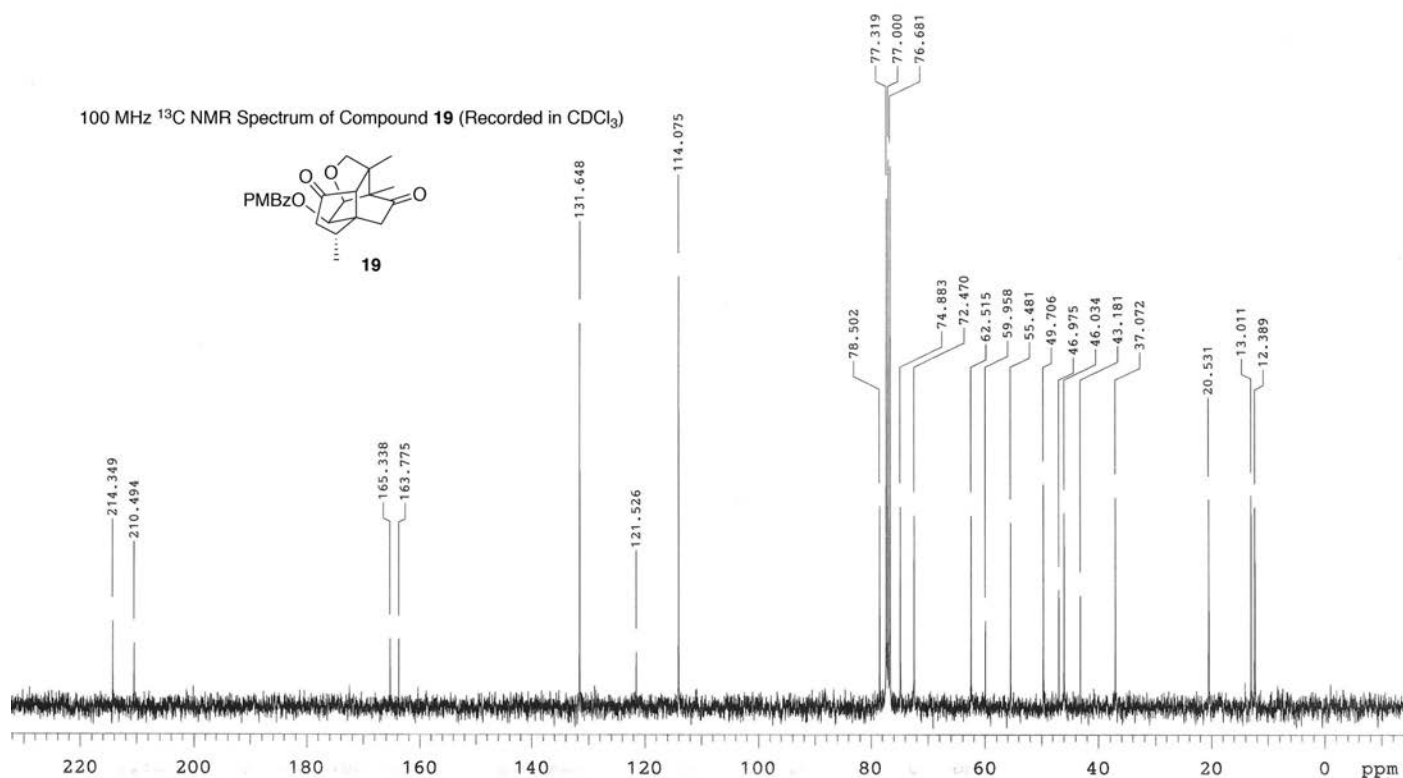

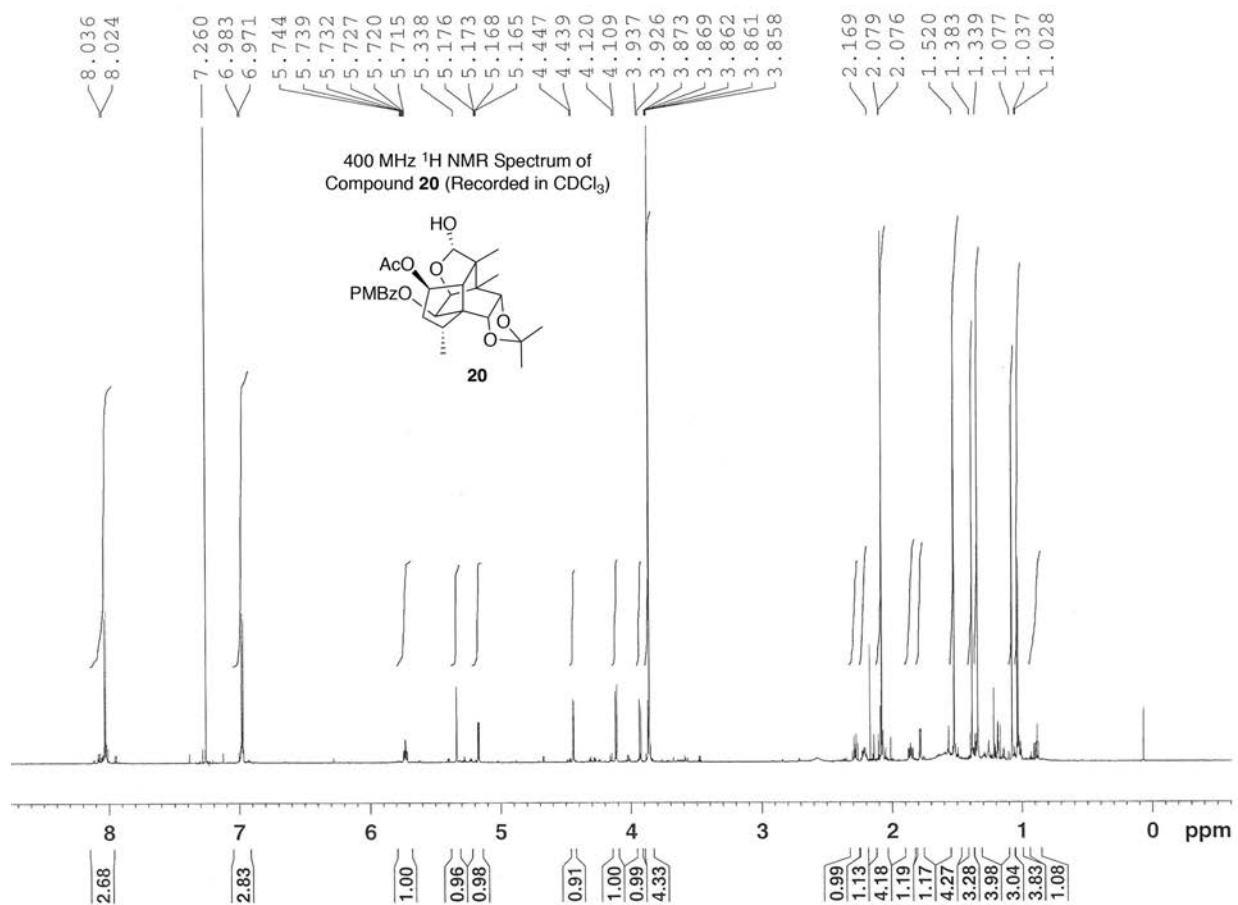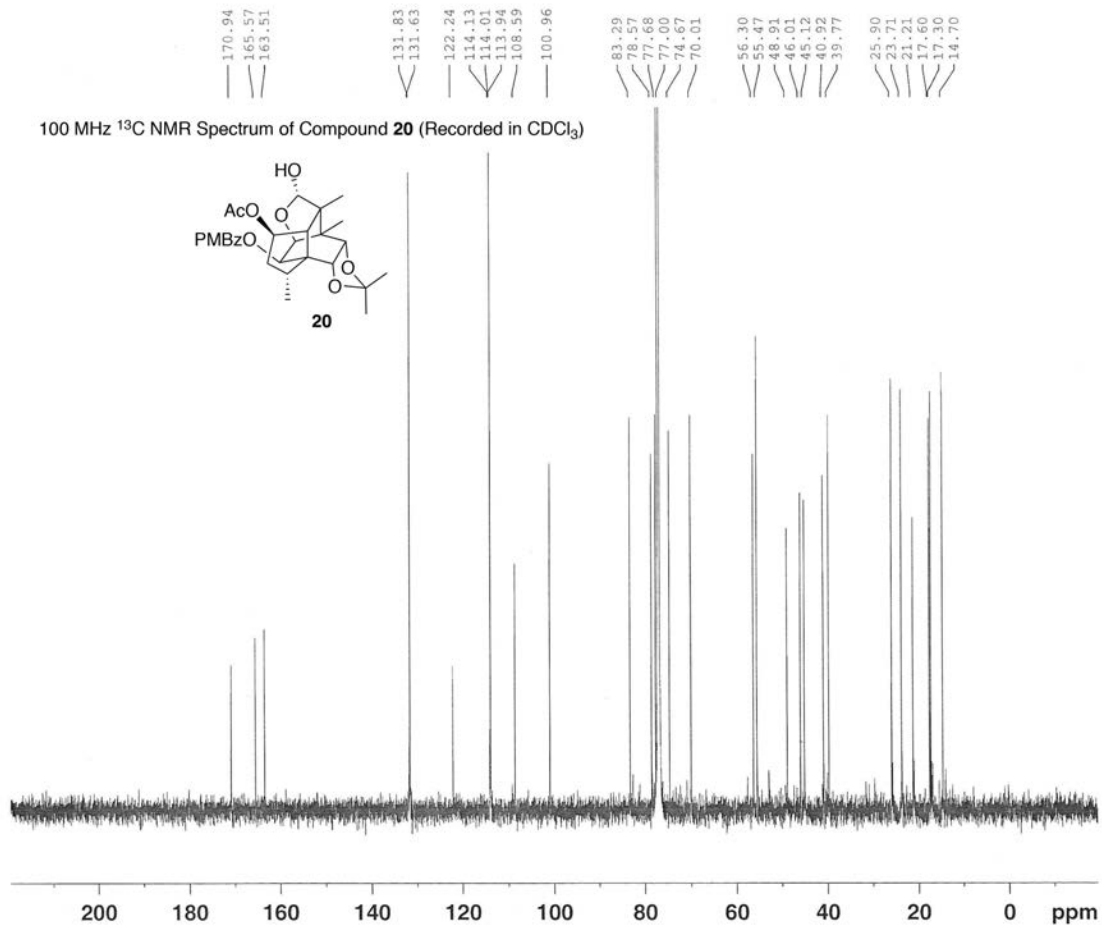

**21**

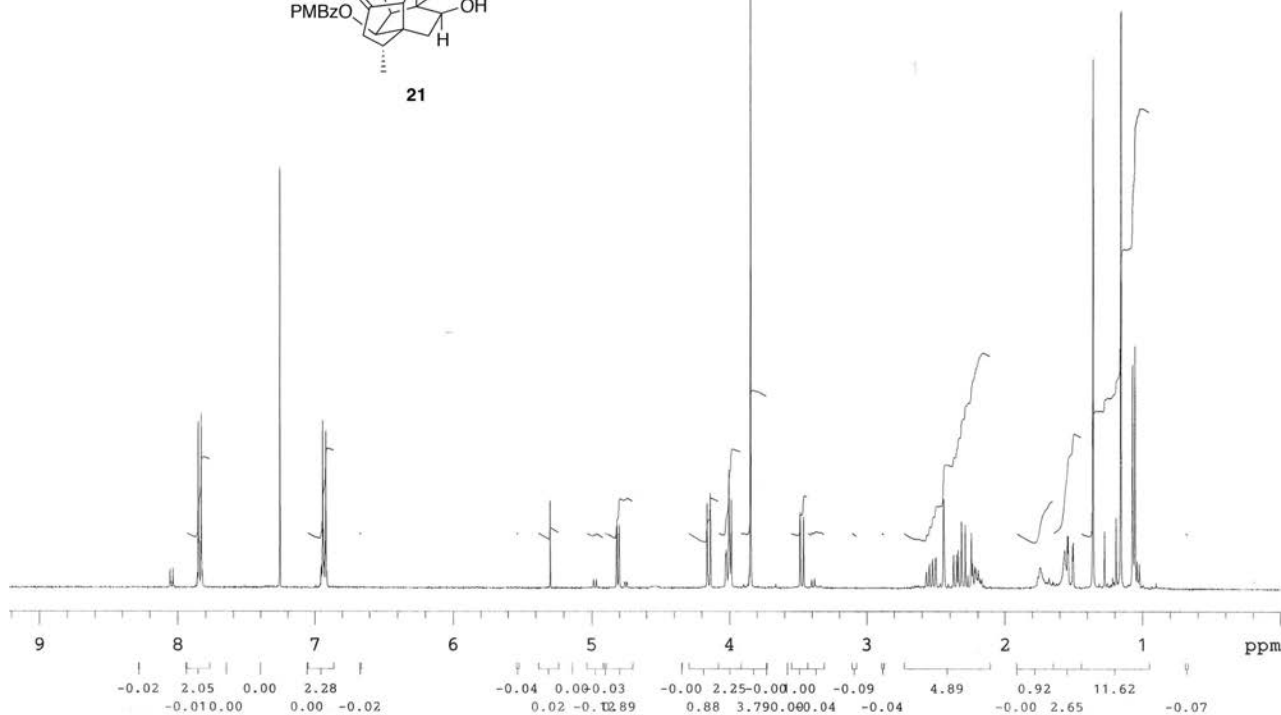

**21**

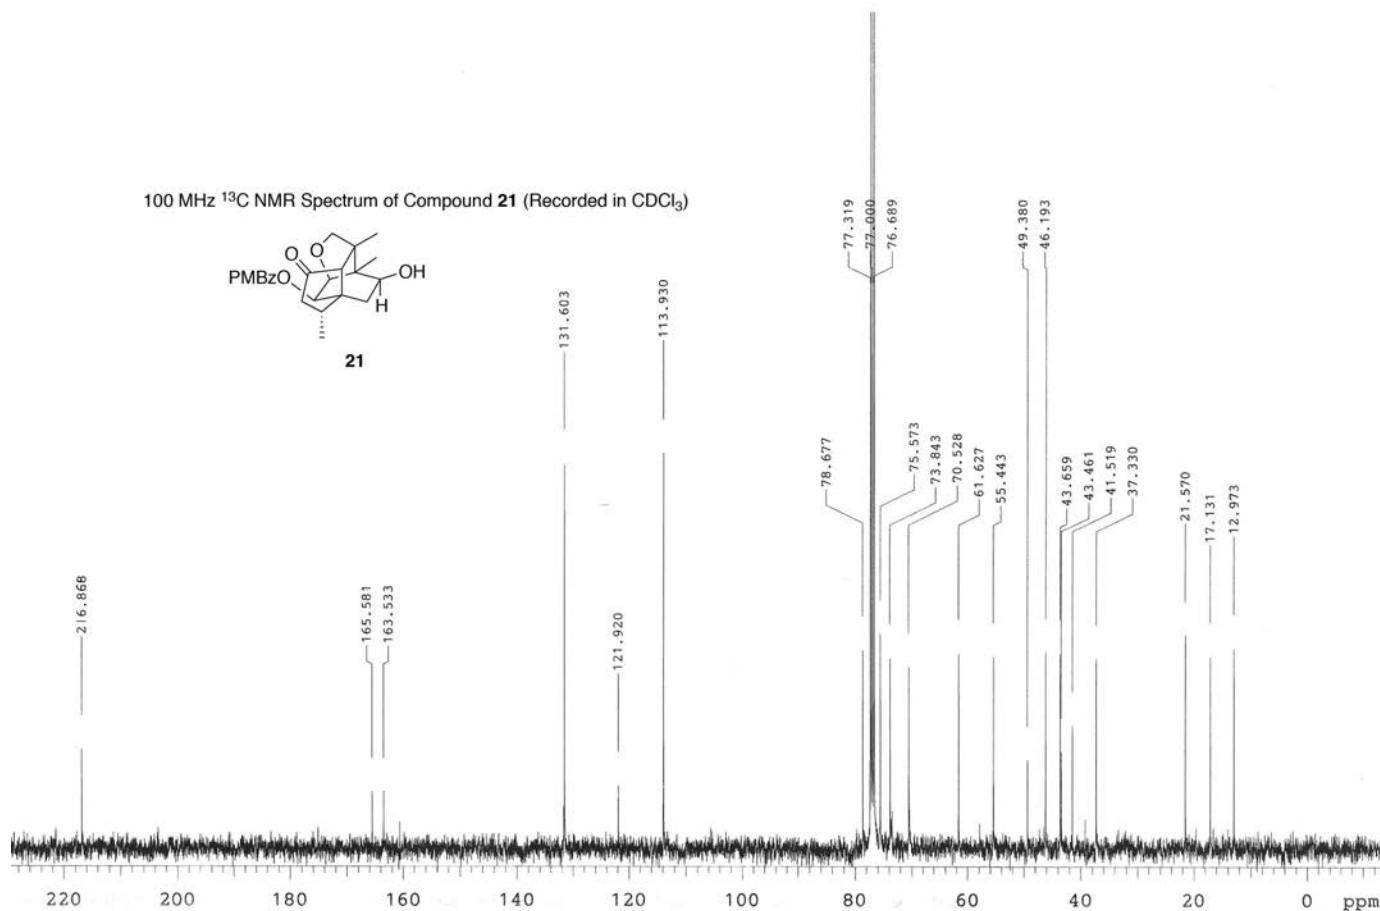



400 MHz  $^1\text{H}$  NMR Spectrum of Compound **22** (Recorded in  $\text{CDCl}_3$ )

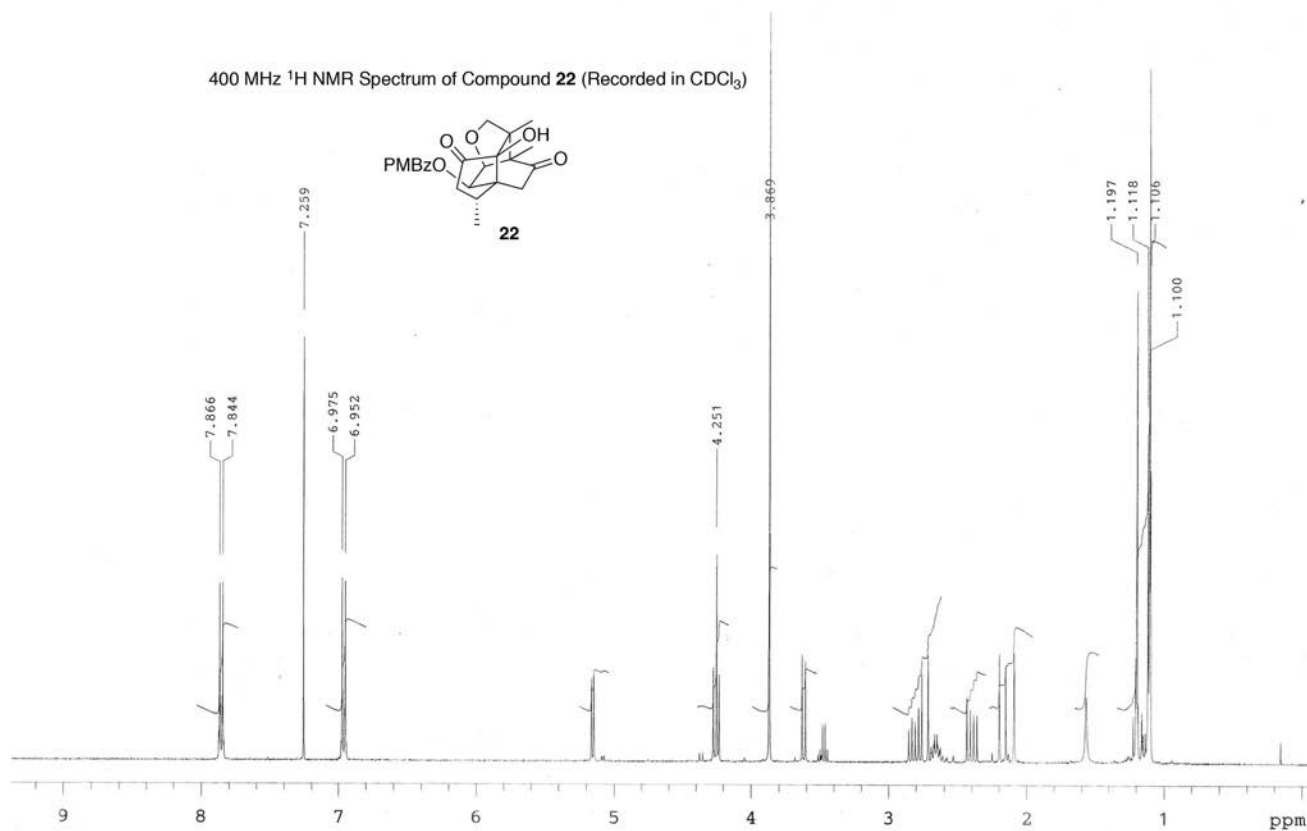

100 MHz  $^{13}\text{C}$  NMR Spectrum of Compound **22** (Recorded in  $\text{CDCl}_3$ )

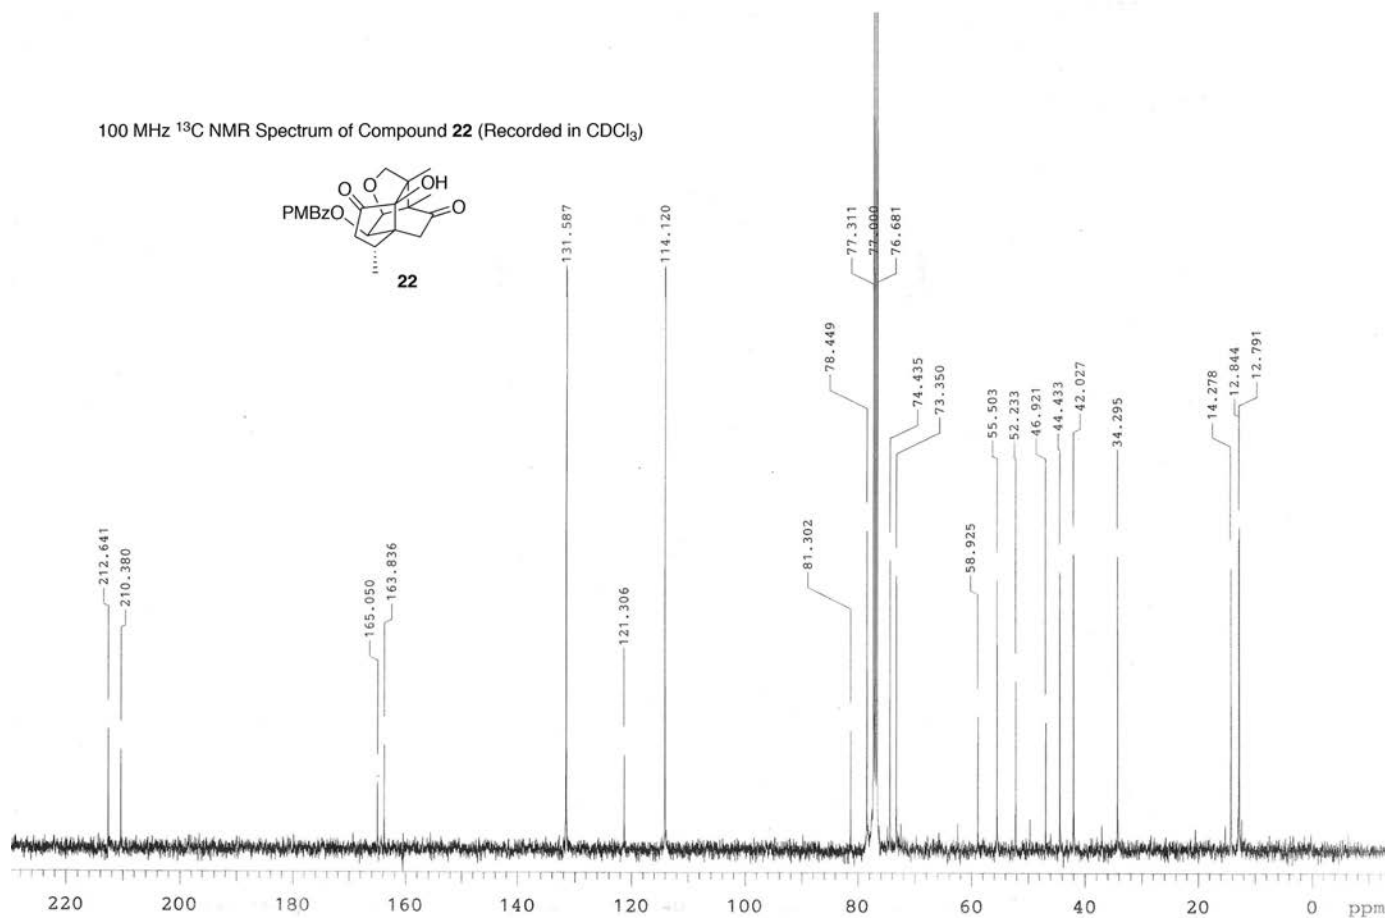

Supplement: Supplementary file 1 [file 3823510]
